# Supplementary material for: Improving the crystallinity and magnetocaloric effect of the perovskite La0.65Sr0.35MnO3 using microwave irradiation
Source: Royal Society of Chemistry journal article supplement (doi:10.1039/c7ce00882a), 2017-01-01

## Contents

|                                                                                                                                                                                                                                                                                                                                                                                                                                                                                                              |    |
|--------------------------------------------------------------------------------------------------------------------------------------------------------------------------------------------------------------------------------------------------------------------------------------------------------------------------------------------------------------------------------------------------------------------------------------------------------------------------------------------------------------|----|
| <b>Figure S1</b> – (Top) Brownian Rotations (Middle) Néel Rotations (Bottom) Hysteresis Loop of a ferromagnetic particle under an alternating current. ....                                                                                                                                                                                                                                                                                                                                                  | 2  |
| <b>Figure S2</b> – Ideal perovskite structures of (a) Lanthanum manganate and (b) Lanthanum strontium manganate .....                                                                                                                                                                                                                                                                                                                                                                                        | 3  |
| <b>Figure S3</b> – Double-exchange mechanism involving the resonant transfer of two electrons where one 'spin up' electron is transferred from the intermediate oxide to the Mn <sup>4+</sup> (Atom 2), and is replaced by another electron from the high-spin Mn <sup>3+</sup> (Atom 1) which is also 'spin up' to obey the Pauli principle. Thus the magnetic information transferred is ferromagnetic, constantly shuttling back and forth through itinerant electrons (shown in scenarios A and B). .... | 4  |
| <b>Table S1</b> - Key characterisations on samples presented in this work. LSMO35 - MW* has been synthesised at 100 W for 2 hours. Hence, LSMO35 - MW*, LSMO35 – 100W* and LSMO35 – 2hrs* are all the same sample.....                                                                                                                                                                                                                                                                                       | 5  |
| <b>Table S2</b> - Lattice parameters and atomic coordinates for <b>(a)</b> Orthorhombic (Pnma) and <b>(b)</b> Rhombohedral (R-3c) which were used to as input parameters for Rietveld analysis for each material. ....                                                                                                                                                                                                                                                                                       | 6  |
| <b>Figure S4</b> – Rietveld analyses of X-ray diffraction patterns and scanning electron micrographs (SEM) of a selection of LSMO materials (a) LSMO25-MW (b) LSMO35-MW and (c) LSMO40-MW to quantify the relative weight percentages of orthorhombic (Pnma) and rhombohedral (R-3c) crystalline phases. The red line below each diffraction pattern is the difference plot which gives an indication of the variation between the calculated and experimental data. ....                                    | 7  |
| <b>Equation S1</b> - The SAR is estimated using the following corrected slope method equation using Wildeboer <i>et.al</i> 's method: .....                                                                                                                                                                                                                                                                                                                                                                  | 8  |
| <b>Figure S5</b> – EDX Maps - LSMO25MW .....                                                                                                                                                                                                                                                                                                                                                                                                                                                                 | 9  |
| <b>Figure S6</b> – EDX Maps of LSMO35MW .....                                                                                                                                                                                                                                                                                                                                                                                                                                                                | 10 |
| <b>Figure S7</b> – EDX Maps of LSMO40MW .....                                                                                                                                                                                                                                                                                                                                                                                                                                                                | 11 |
| <b>Figure S8</b> – EDX Maps of LSMO35RedVol.....                                                                                                                                                                                                                                                                                                                                                                                                                                                             | 12 |
| <b>Figure S9</b> – EDX Maps of LSMO35MW 50W.....                                                                                                                                                                                                                                                                                                                                                                                                                                                             | 13 |
| <b>Figure S10</b> - The relationship between the strontium dopant level (x) and the percentage of Pnma crystal structure as determined from Rietveld analysis of powder diffraction data. Connecting lines are included as a guide to the eye. A polynomial fit was limited to the dopant range of interest where $0.25 \leq x \leq 0.4$ . ....                                                                                                                                                              | 14 |
| <b>Figure S11</b> – SEM comparison (a) LSMO35MW-10 minutes (b) LSMO35MW – 30 minutes and (c) LSMO35MW - 2 hours taken at x20,000 magnification.....                                                                                                                                                                                                                                                                                                                                                          | 15 |
| <b>Figure S12</b> – Arrott plots to calculate Curie Temperatures for (a) LSMO35MW-Con, (b) LSMO35MW-50W, (c) LSMO35MW-100W, (d) LSMO35MW-200W.....                                                                                                                                                                                                                                                                                                                                                           | 16 |

**Figure S1** – (Top) Brownian Rotations (Middle) Néel Rotations (Bottom) Hysteresis Loop of a ferromagnetic particle under an alternating current.

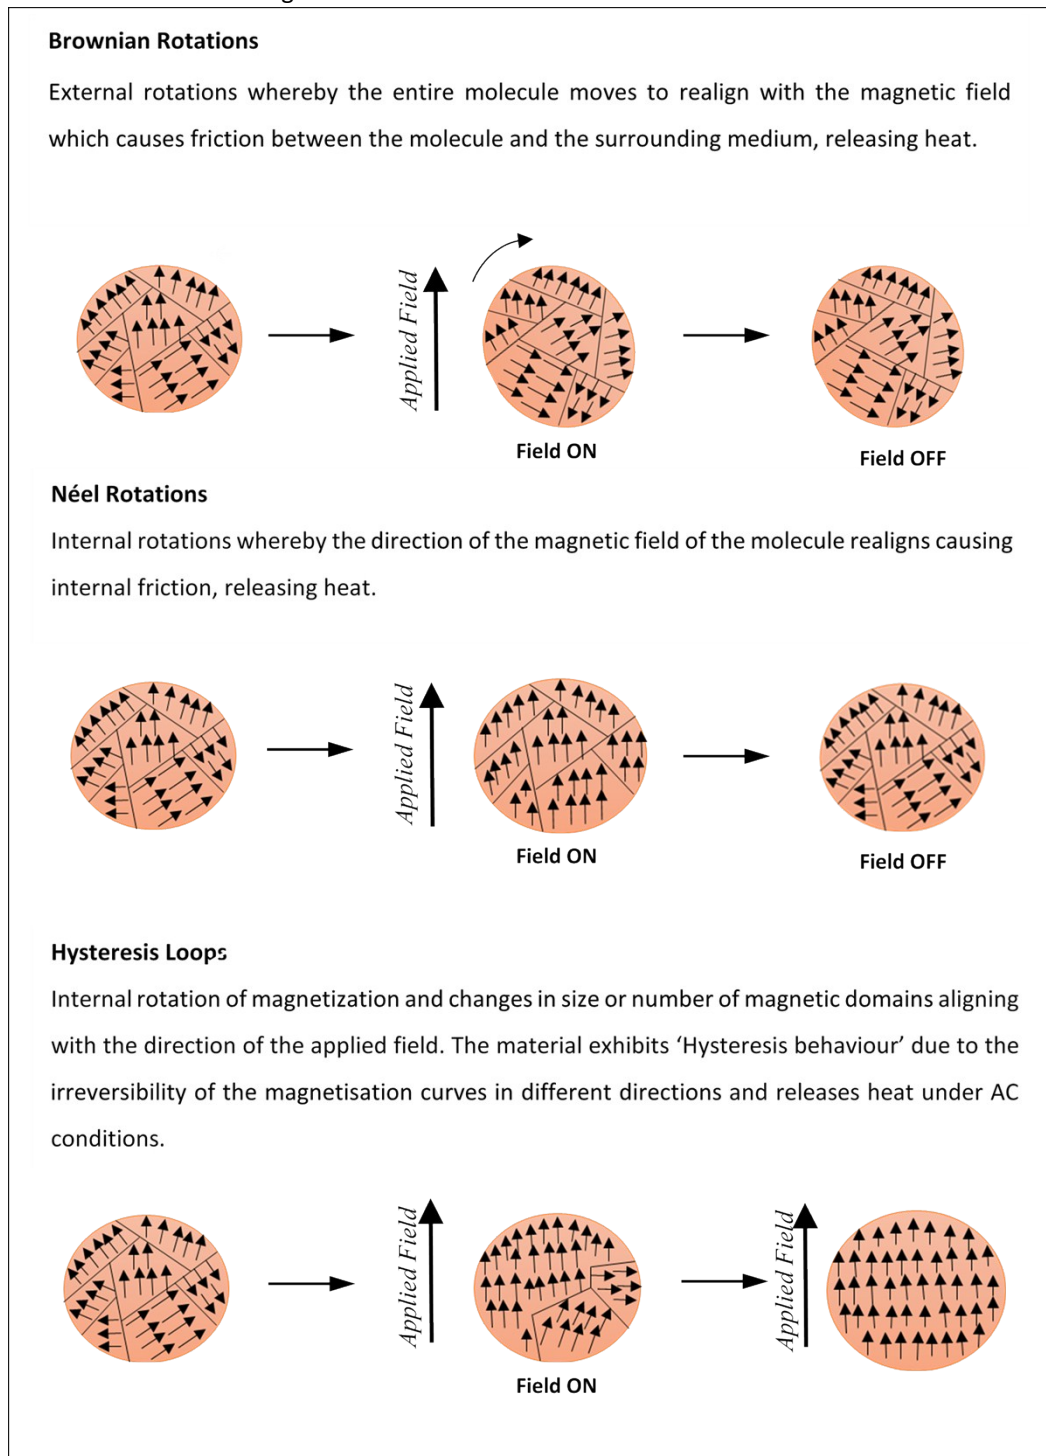

Figure S2– Ideal perovskite structures of (a) Lanthanum manganate and (b) Lanthanum strontium manganate

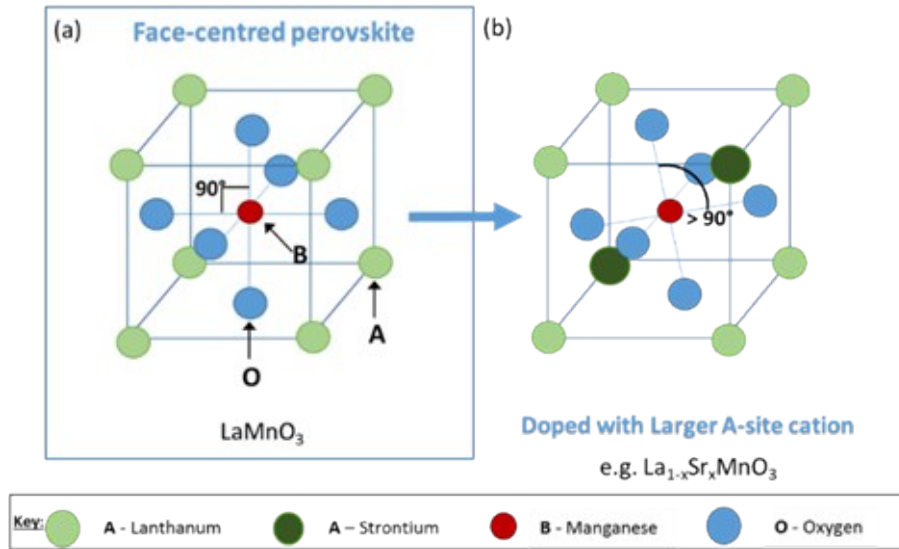

**Figure S3** – Double-exchange mechanism involving the resonant transfer of two electrons where one 'spin up' electron is transferred from the intermediate oxide to the  $\text{Mn}^{4+}$  (Atom 2), and is replaced by another electron from the high-spin  $\text{Mn}^{3+}$  (Atom 1) which is also 'spin up' to obey the Pauli principle. Thus the magnetic information transferred is ferromagnetic, constantly shuttling back and forth through itinerant electrons (shown in scenarios A and B).

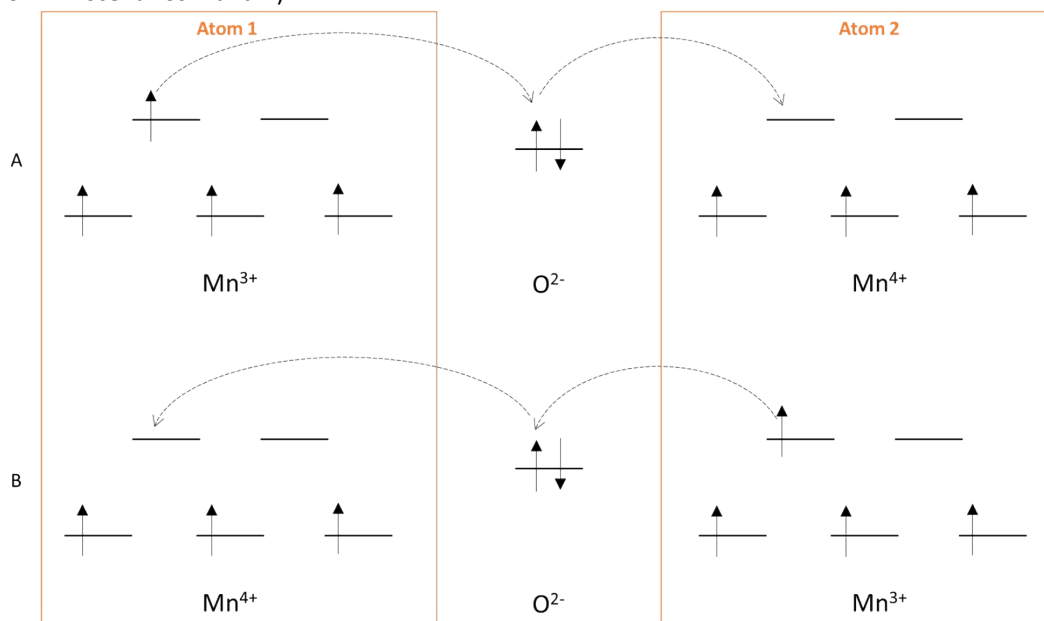

**Table S1** - Key characterisations on samples presented in this work. LSMO35 - MW\* has been synthesised at 100 W for 2 hours. Hence, LSMO35 - MW\*, LSMO35 – 100W\* and LSMO35 – 2hrs\* are all the same sample.

| Sample Code     | Heating | Time   | EDX | XRD | Induction Heating | SEM | MvT (SQUID) | MvH (SQUID) |
|-----------------|---------|--------|-----|-----|-------------------|-----|-------------|-------------|
| LSMO25 - Con    | Con     | 2 hrs  | ✓   | ✓   |                   |     |             |             |
| LSMO35 - Con    | Con     | 2 hrs  | ✓   | ✓   | ✓                 | ✓   |             |             |
| LSMO40 - Con    | Con     | 2 hrs  | ✓   | ✓   | ✓                 |     |             |             |
| LSMO25 - MW     | 100 W   | 2 hrs  | ✓   | ✓   | ✓                 | ✓   | ✓           |             |
| LSMO35 - RedVol | Con     | 2 hrs  | ✓   |     | ✓                 |     | ✓           |             |
| LSMO35 – MW*    | 100 W   | 2 hrs  | ✓   | ✓   | ✓                 | ✓   | ✓           |             |
| LSMO35 - 50W    | 50 W    | 2 hrs  | ✓   |     | ✓                 |     | ✓           |             |
| LSMO35 - 100W*  | 100 W   | 2 hrs  | ✓   | ✓   | ✓                 | ✓   | ✓           |             |
| LSMO35 - 200W   | 200 W   | 2 hrs  | ✓   |     | ✓                 |     | ✓           |             |
| LSMO35 - 10min  | 100 W   | 10 min |     |     | ✓                 | ✓   |             |             |
| LSMO35 - 30min  | 100 W   | 30 min |     |     | ✓                 | ✓   |             |             |
| LSMO35 - 2hrs*  | 100 W   | 2 hrs  | ✓   | ✓   | ✓                 | ✓   | ✓           |             |
| LSMO40 - MW     | 100 W   | 2 hrs  | ✓   | ✓   | ✓                 | ✓   | ✓           |             |

**Table S2** - Lattice parameters and atomic coordinates for **(a)** Orthorhombic (Pnma) and **(b)** Rhombohedral (R-3c) which were used to as input parameters for Rietveld analysis for each material.

**(a)** Orthorhombic (Pnma) lattice parameters and atomic coordinates

$$a = 5.5743, b = 7.695 \text{ and } c = 5.537$$

| Atom | Wyckoff Position | x      | y     | z      | B <sub>iso</sub> |
|------|------------------|--------|-------|--------|------------------|
| La   | 4c               | 0.55   | 0.25  | 0.009  | 0.5              |
| Mn   | 4a               | 0      | 0     | 0      | 0.5              |
| O(1) | 4c               | -0.011 | 0.25  | -0.071 | 0.5              |
| O(2) | 8d               | 0.309  | 0.039 | 0.225  | 0.5              |

**(b)** Rhombohedral (R-3c) lattice parameters and atomic coordinates

$$a = b = 5.5212 \text{ and } c = 13.37908$$

| Atom | Wyckoff Position | x      | y | z    | B <sub>iso</sub> |
|------|------------------|--------|---|------|------------------|
| La   | 6a               | 0      | 0 | 0.25 | 0.5              |
| Mn   | 6b               | 0      | 0 | 0    | 0.5              |
| O    | 18e              | 0.5511 | 0 | 0.25 | 0.5              |

**Figure S4** – Rietveld analyses of X-ray diffraction patterns and scanning electron micrographs (SEM) of a selection of LSMO materials (a) LSMO25-MW (b) LSMO35-MW and (c) LSMO40-MW to quantify the relative weight percentages of orthorhombic (Pnma) and rhombohedral (R-3c) crystalline phases. The red line below each diffraction pattern is the difference plot which gives an indication of the variation between the calculated and experimental data.

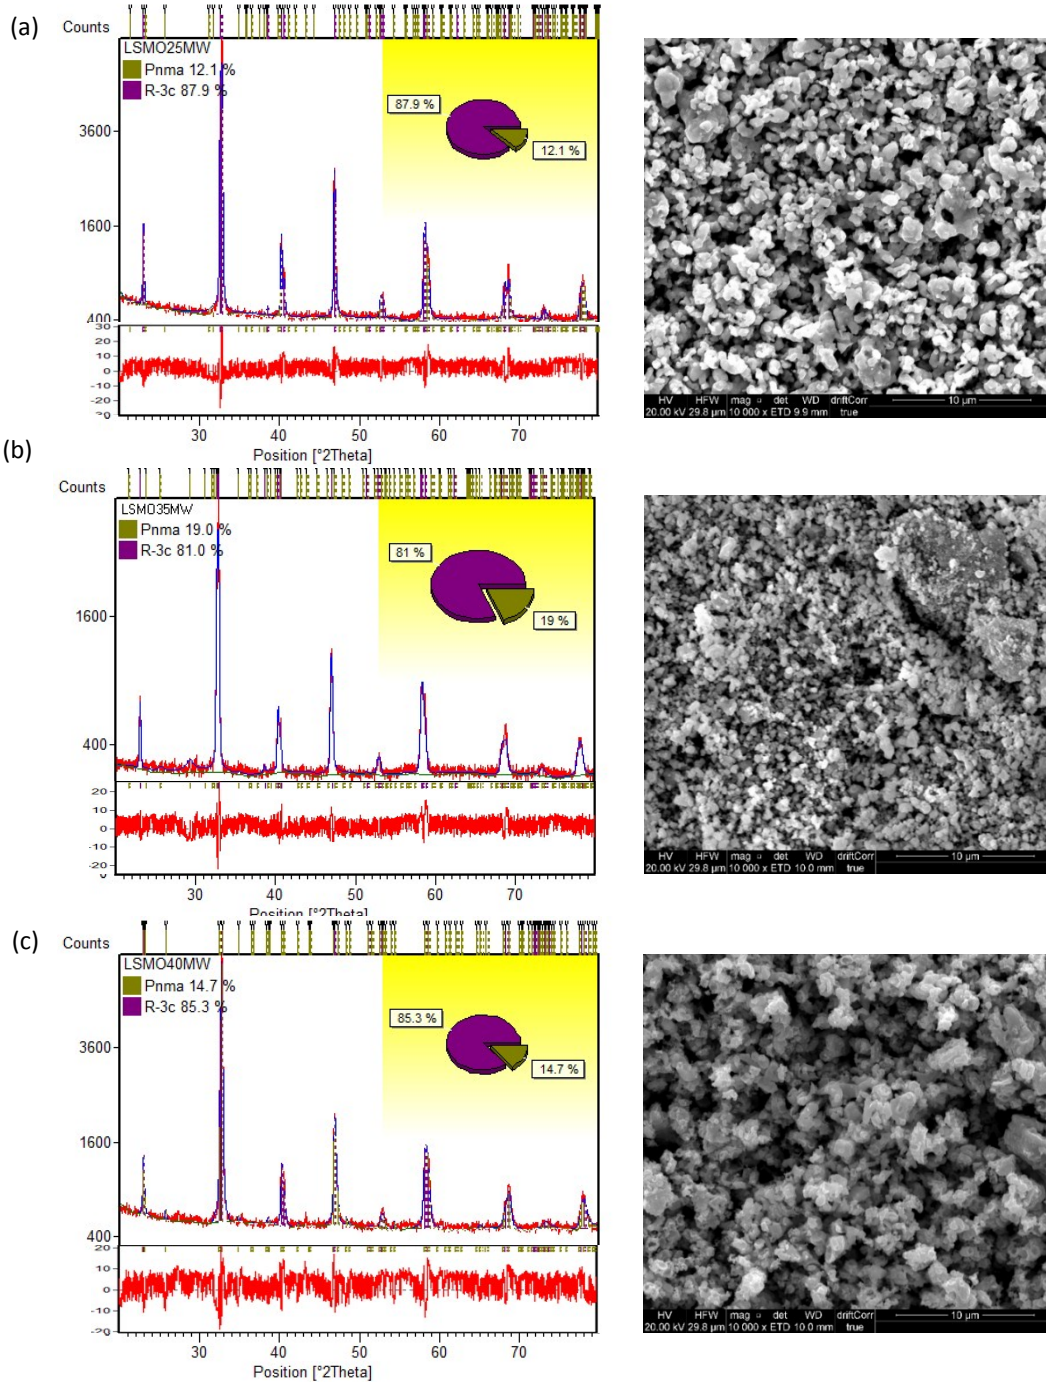

**Equation S1** - The SAR is estimated using the following corrected slope method equation using Wildeboer *et.al*'s method:

$$SAR_{corrected\ slope} = \frac{C_w \frac{\Delta T_w}{\Delta t} + L \Delta T_w}{m_{MNP}}$$

where  $C_w$  = Specific Heat Capacity ( $J\ g^{-1}\ K^{-1}$ ) of water,  $m_{MNP}$  = Weight fraction of the magnetically active element,  $\frac{\Delta T_w}{\Delta t}$  = Change in Temperature against time,  $L$  = Thermal Losses of the system.



Figure S5 – EDX Maps - LSMO25MW

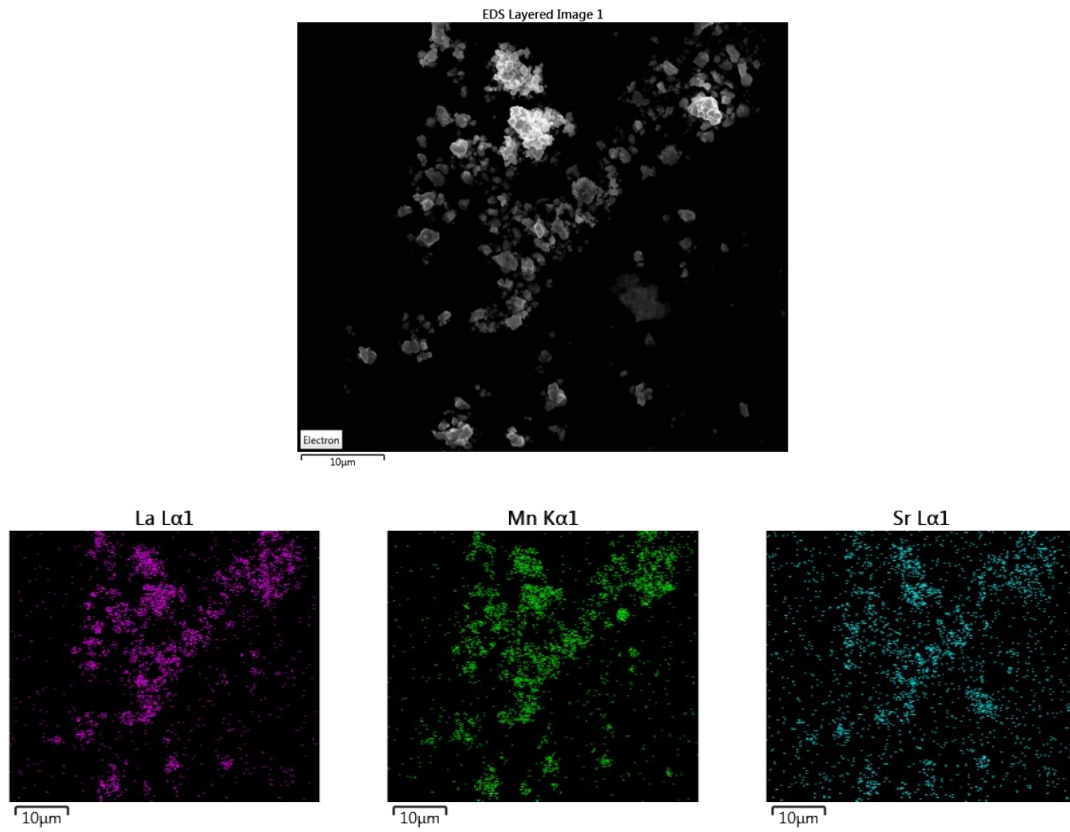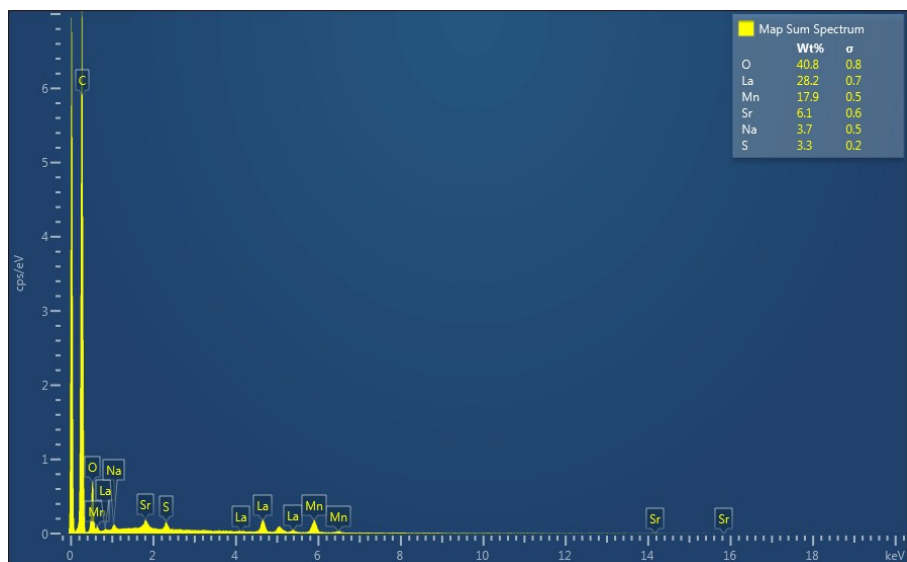

Figure S6 – EDX Maps of LSMO35MW

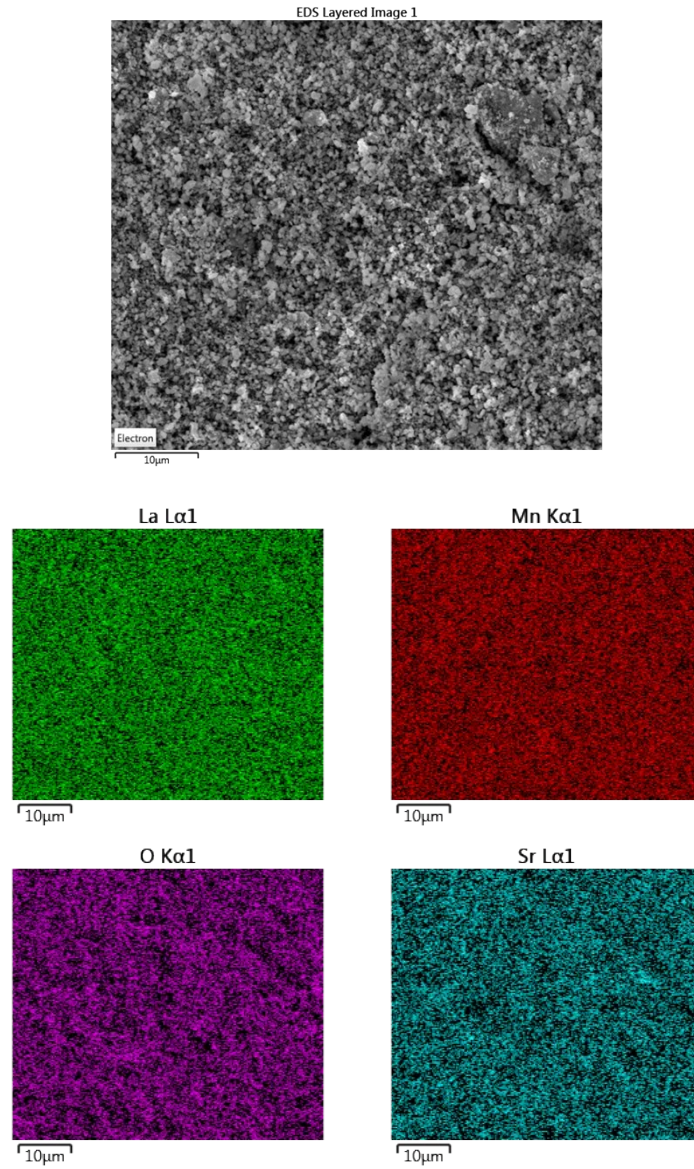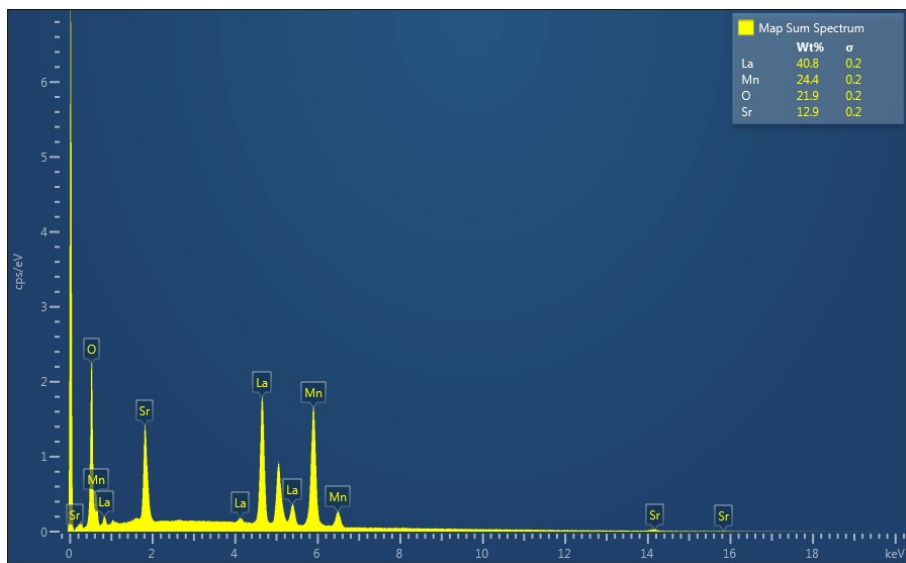

Figure S7 – EDX Maps of LSMO40MW

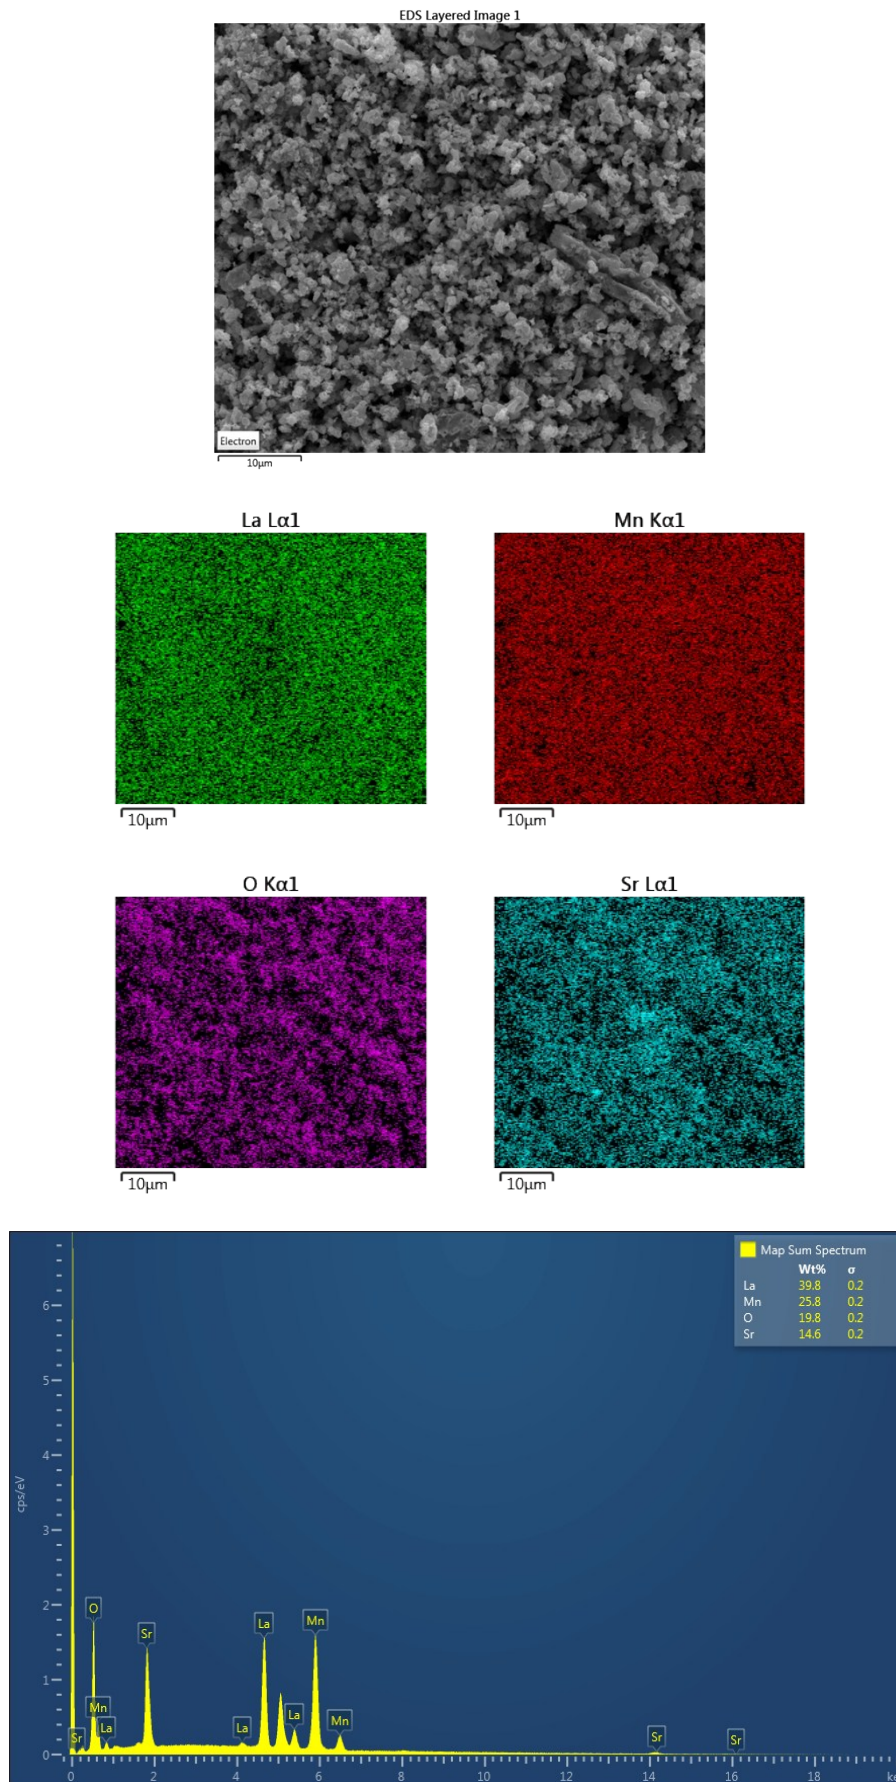

Figure S8 – EDX Maps of LSMO35RedVol

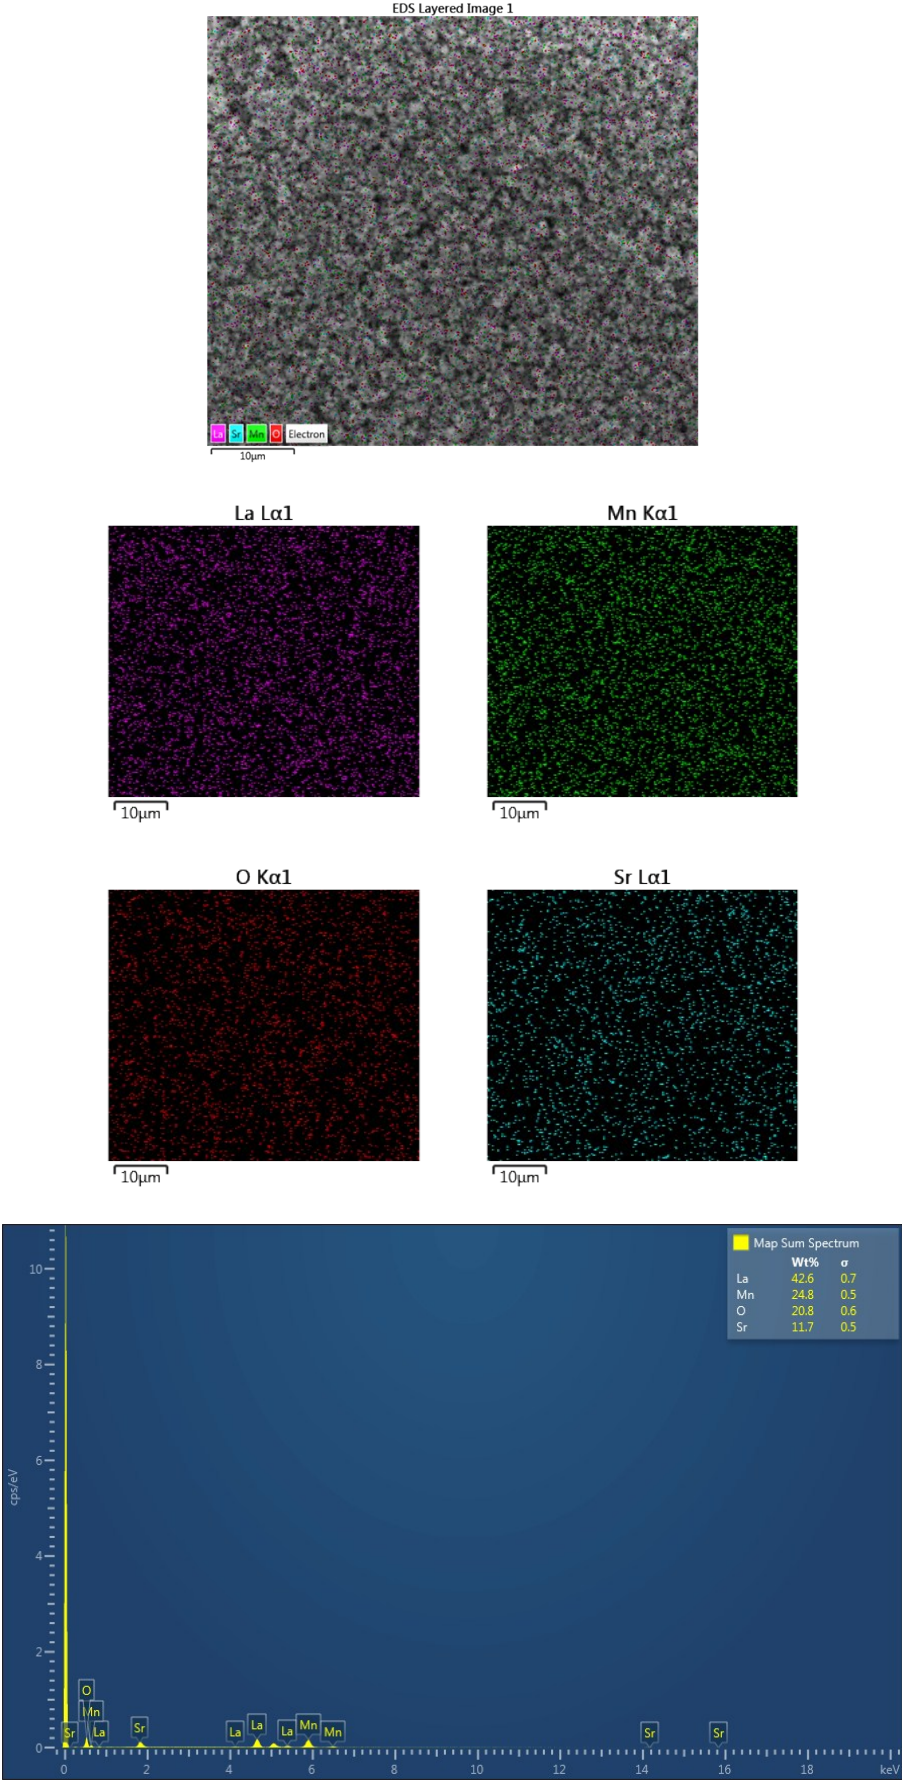

Figure S9 – EDX Maps of LSMO35MW 50W

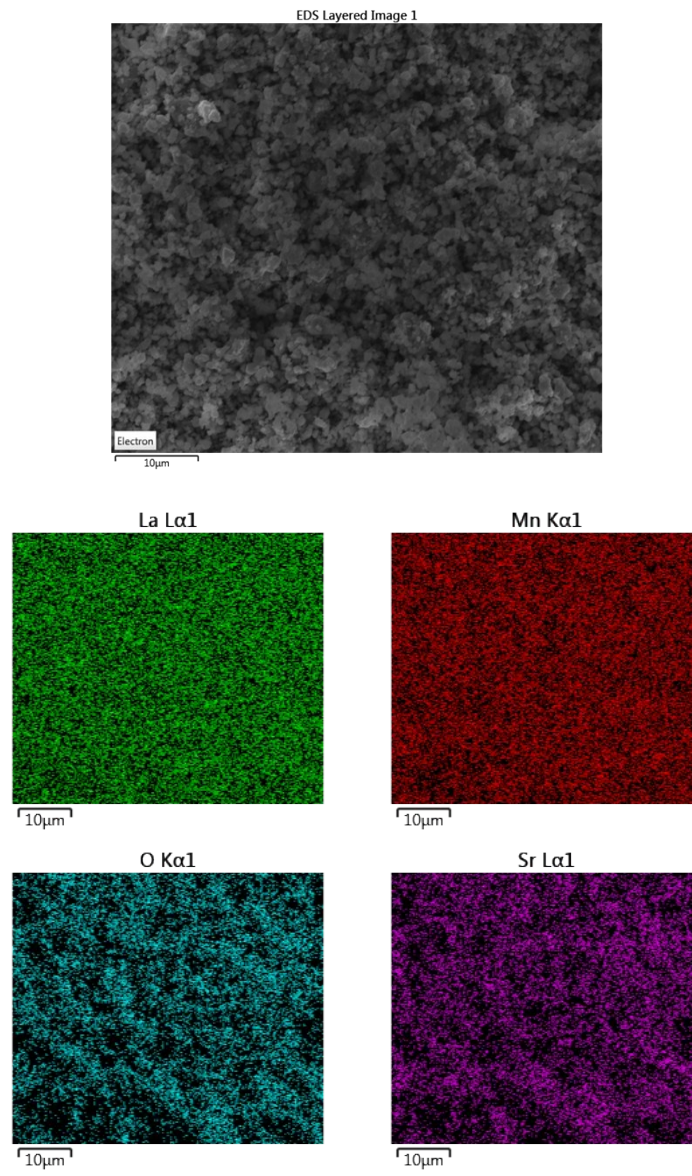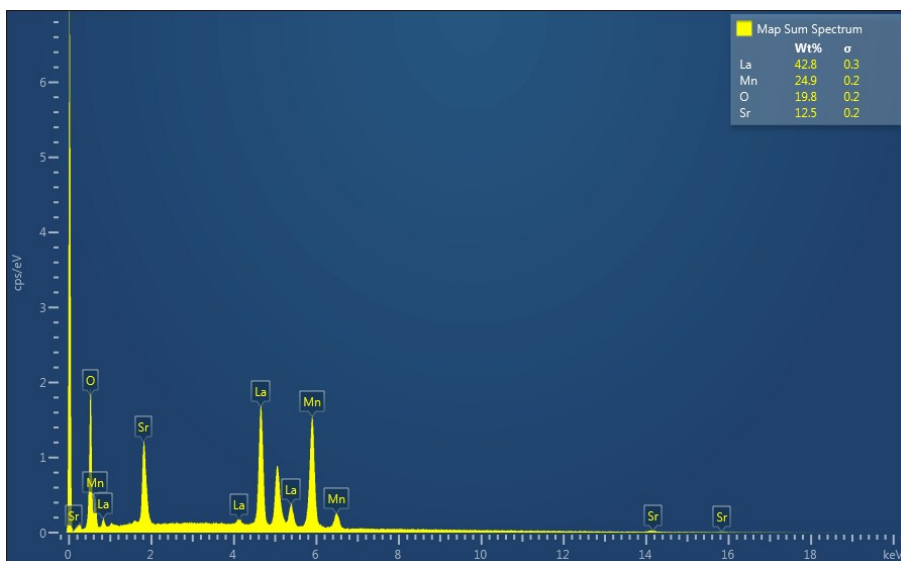

**Figure S10** - The relationship between the strontium dopant level ( $x$ ) and the percentage of Pnma crystal structure as determined from Rietveld analysis of powder diffraction data. Connecting lines are included as a guide to the eye. A polynomial fit was limited to the dopant range of interest where  $0.25 \leq x \leq 0.4$ .

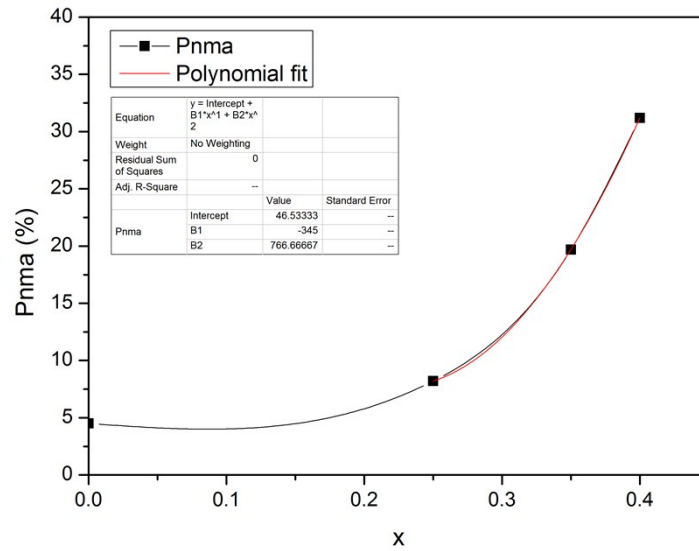

**Figure S11** – SEM comparison (a) LSMO35MW-10 minutes (b) LSMO35MW – 30 minutes and (c) LSMO35MW - 2 hours taken at x20,000 magnification.

(a)

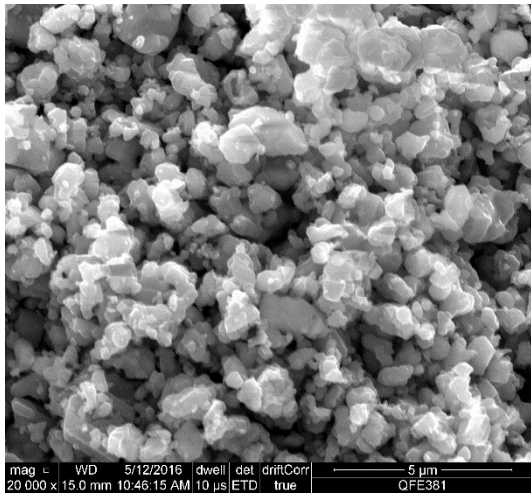

(b)

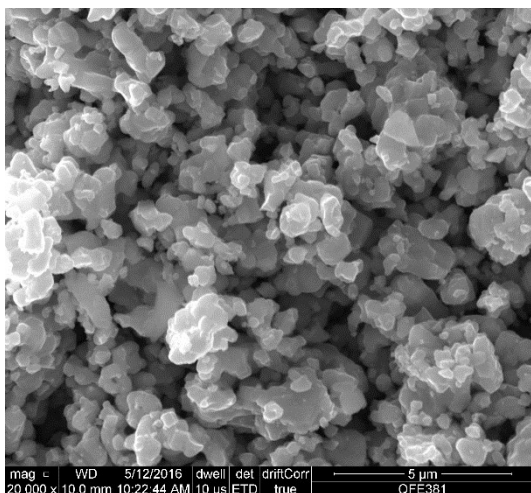

(c)

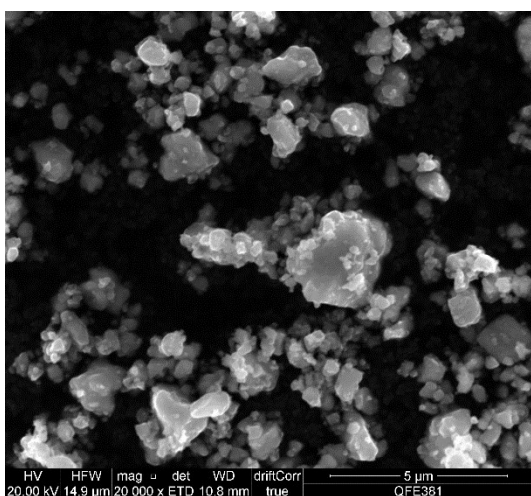

**Figure S12** – Arrott plots to calculate Curie Temperatures for (a) LSMO35MW-Con, (b) LSMO35MW-50W, (c) LSMO35MW-100W, (d) LSMO35MW-200W.

(a)

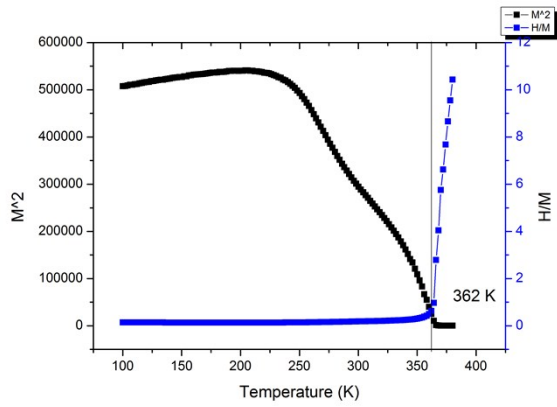

(c)

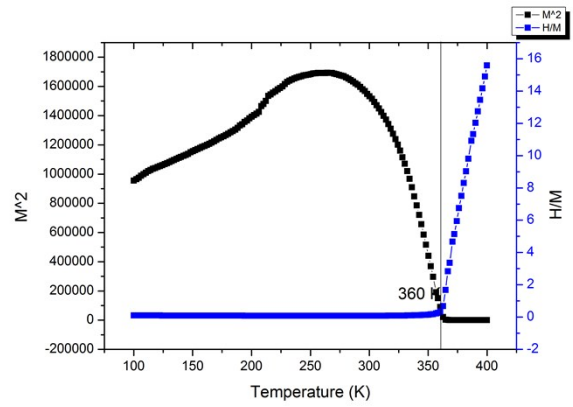

(b)

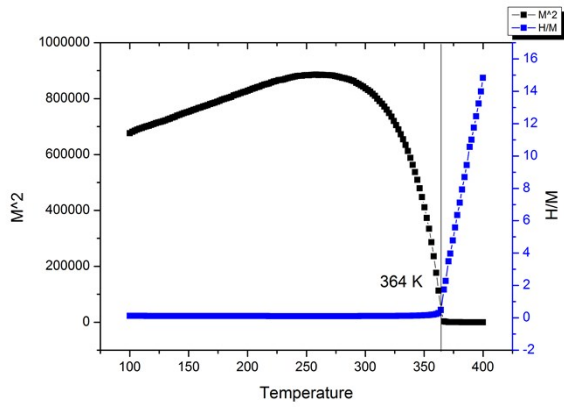

(d)

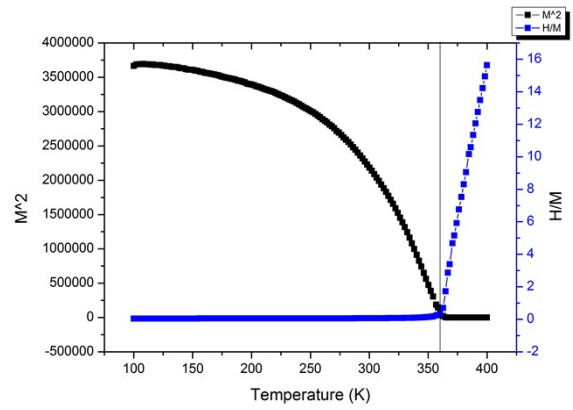

Supplement: c7ce00882a1.pdf [file c7ce00882a1.pdf]
